# Supplementary material for: The Relationship between Parental Autonomy Support and Children’s Self-Concept in China—The Role of Basic Psychological Needs
Source: MDPI journal article supplement (doi:10.3390/bs14050415), 2024-05-15
Supplement: s1 [file s1]

**Table S1.** Measurement invariance test.

| Group  | Measurement Model        | CMIN/DF | RMSEA | CFI   | SRMR   | Models  | ΔCFI   | ΔRMSEA |
|--------|--------------------------|---------|-------|-------|--------|---------|--------|--------|
| Gender | 1 Unconstrained          | 6.939   | 0.044 | 0.993 | 0.017  |         |        |        |
|        | 2 Measurement weights    | 6.417   | 0.042 | 0.991 | 0.021  | 2 vs. 1 | -0.002 | -0.002 |
|        | 3 Structural covariances | 6.077   | 0.040 | 0.991 | 0.022  | 3 vs. 2 | 0.000  | -0.002 |
|        | 4 Measurement residuals  | 8.197   | 0.048 | 0.978 | 0.021  | 4 vs. 3 | -0.013 | 0.008  |
| Grade  | 1 Unconstrained          | 6.340   | 0.041 | 0.994 | 0.0163 |         |        |        |
|        | 2 Measurement weights    | 5.911   | 0.040 | 0.991 | 0.0228 | 2 vs. 1 | -0.003 | -0.001 |
|        | 3 Structural covariances | 5.861   | 0.040 | 0.991 | 0.0273 | 3 vs. 2 | 0.000  | 0.000  |
|        | 4 Measurement residuals  | 10.350  | 0.055 | 0.971 | 0.0207 | 4 vs. 3 | -0.02  | 0.015  |

**Table S2.** Multi-group analysis fitness and model invariance test table.

| Model | CMIN/DF | RMSEA | NFI   | CFI   | GFI   | ΔCMIN  | ΔDF | <i>p</i> | Δ NFI | ΔIFI  |
|-------|---------|-------|-------|-------|-------|--------|-----|----------|-------|-------|
| M1    | 5.790   | 0.039 | 0.977 | 0.981 | 0.969 | -      | -   | -        | -     | -     |
| M2    | 5.585   | 0.038 | 0.976 | 0.980 | 0.967 | 29.418 | 9   | 0.001    | 0.001 | 0.001 |
| M3    | 5.512   | 0.038 | 0.975 | 0.980 | 0.967 | 37.794 | 12  | 0.000    | 0.001 | 0.001 |
| M4    | 5.465   | 0.038 | 0.975 | 0.980 | 0.967 | 37.974 | 13  | 0.000    | 0.001 | 0.001 |
| M5    | 5.169   | 0.037 | 0.974 | 0.979 | 0.965 | 76.271 | 27  | 0.000    | 0.003 | 0.003 |

<sup>1</sup> M1 (Unconstrained Model), M2 (Measurement weights Model), M3 (Structural weights Model), M4 (Structural covariances Model), M5 (Measurement residuals Model).

**Table S3.** Multi-group analysis across gender fitness and model invariance test table.

|                 | <b>Model</b> | <b>CMIN/DF</b> | <b>RMSEA</b> | <b>NFI</b> | <b>CFI</b> | <b>GFI</b> | <b>ΔCMIN</b> | <b>ΔDF</b> | <b><i>p</i></b> | <b>Δ NFI</b> | <b>ΔIFI</b> |
|-----------------|--------------|----------------|--------------|------------|------------|------------|--------------|------------|-----------------|--------------|-------------|
| M <sub>AN</sub> | M1           | 5.467          | 0.038        | 0.968      | 0.973      | 0.961      | -            | -          | -               | -            | -           |
|                 | M2           | 5.309          | 0.037        | 0.966      | 0.973      | 0.960      | 31.549       | 11         | 0.001           | 0.001        | 0.001       |
|                 | M3           | 5.224          | 0.037        | 0.966      | 0.972      | 0.960      | 37.149       | 15         | 0.001           | 0.001        | 0.001       |
|                 | M4           | 5.184          | 0.037        | 0.966      | 0.972      | 0.960      | 45.234       | 18         | 0.000           | 0.002        | 0.002       |
|                 | M5           | 5.060          | 0.036        | 0.964      | 0.971      | 0.957      | 107.890      | 35         | 0.000           | 0.004        | 0.004       |
| M <sub>CN</sub> | M1           | 9.913          | 0.054        | 0.943      | 0.948      | 0.930      | -            | -          | -               | -            | -           |
|                 | M2           | 9.515          | 0.052        | 0.942      | 0.948      | 0.929      | 37.731       | 11         | 0.000           | 0.001        | 0.001       |
|                 | M3           | 9.308          | 0.052        | 0.941      | 0.947      | 0.929      | 47.278       | 16         | 0.000           | 0.002        | 0.002       |
|                 | M4           | 9.204          | 0.051        | 0.941      | 0.947      | 0.928      | 55.650       | 19         | 0.000           | 0.002        | 0.002       |
|                 | M5           | 8.768          | 0.050        | 0.939      | 0.945      | 0.926      | 123.295      | 36         | 0.000           | 0.004        | 0.004       |
| M <sub>RN</sub> | M1           | 8.526          | 0.049        | 0.950      | 0.956      | 0.940      | -            | -          | -               | -            | -           |
|                 | M2           | 8.245          | 0.048        | 0.949      | 0.955      | 0.939      | 43.385       | 11         | 0.000           | 0.002        | 0.002       |
|                 | M3           | 8.070          | 0.048        | 0.949      | 0.955      | 0.939      | 52.485       | 16         | 0.000           | 0.002        | 0.002       |
|                 | M4           | 7.985          | 0.047        | 0.948      | 0.954      | 0.939      | 60.697       | 19         | 0.000           | 0.002        | 0.002       |
|                 | M5           | 7.621          | 0.046        | 0.946      | 0.953      | 0.936      | 122.349      | 36         | 0.000           | 0.004        | 0.004       |

<sup>1</sup> M1 (Unconstrained Model), M2 (Measurement weights Model), M3 (Structural weights Model), M4 (Structural covariances Model), M5 (Measurement residuals Model).
